# Supplementary material for: Genome-wide association study of Mycobacterium avium subspecies Paratuberculosis infection in Chinese Holstein
Source: BMC Genomics. 2018 Dec 27;19:972. doi: 10.1186/s12864-018-5385-3 (PMC6307165; doi:10.1186/s12864-018-5385-3)
Supplement: Supplementary file 7 — Table S2. The features of genes based on RODATRIPS. (XLSX 15 kb) [file 12864_2018_5385_MOESM7_ESM.xlsx]

## Sheet: TableS2
Table S2. The features of genes based on ROADTRIPS
Ensembl ID	Chr	Gene Start (bp)	Gene End (bp)	Gene name	Gene type
ENSBTAG00000013235	2	122685823	122695535	TINAGL1	protein_coding
ENSBTAG00000016819	2	122723225	122783830	FABP3	protein_coding
ENSBTAG00000039994	2	122742371	122756595		protein_coding
ENSBTAG00000016818	2	122784558	122889605	ZCCHC17	protein_coding
ENSBTAG00000011582	2	122814786	122817735	SERINC2	protein_coding
ENSBTAG00000035081	2	122824336	122835401		protein_coding
ENSBTAG00000016817	2	122889872	122915674	SNRNP40	protein_coding
ENSBTAG00000020159	2	122975078	122980139	NKAIN1	protein_coding
ENSBTAG00000018979	2	123070708	123196529	PUM1	protein_coding
ENSBTAG00000043864	2	123153220	123153301	RF00188	snoRNA
ENSBTAG00000042860	2	123159836	123159912	RF00188	snoRNA
ENSBTAG00000042142	2	123179899	123179981	RF00188	snoRNA
ENSBTAG00000042775	2	123192312	123192396	RF00188	snoRNA
ENSBTAG00000026676	2	123237086	123244753	SDC3	protein_coding
ENSBTAG00000005477	2	123350418	123376541	LAPTM5	protein_coding
ENSBTAG00000003479	2	123392015	123401324	MATN1	protein_coding
ENSBTAG00000040333	6	117727460	117746408	QDPR	protein_coding
ENSBTAG00000003357	6	117749153	117758920	CLRN2	protein_coding
ENSBTAG00000019584	6	117798819	117856796		protein_coding
ENSBTAG00000027825	6	117898822	117923220		protein_coding
ENSBTAG00000046936	6	117990818	117992917	MRFAP1L1	protein_coding
ENSBTAG00000003766	6	118023637	118025125	BLOC1S4	protein_coding
ENSBTAG00000019427	6	118129452	118178266	KIAA0232	protein_coding
ENSBTAG00000005493	6	118212844	118312151	TBC1D14	protein_coding
ENSBTAG00000047810	6	118316993	118318272	CCDC96	protein_coding
ENSBTAG00000044374	6	118328387	118328465	bta-mir-2453	miRNA
ENSBTAG00000010185	6	118330600	118331622	TADA2B	protein_coding
ENSBTAG00000010181	6	118335668	118349721	GRPEL1	protein_coding
ENSBTAG00000015957	7	22993179	23001067	IL4	protein_coding
ENSBTAG00000015953	7	23018546	23020546	IL13	protein_coding
ENSBTAG00000011252	7	23062886	23169956	RAD50	protein_coding
ENSBTAG00000031235	7	23184382	23186782	IL5	protein_coding
ENSBTAG00000031231	7	23235653	23243697	IRF1	protein_coding
ENSBTAG00000000668	7	23329260	23355525	SLC22A5	protein_coding
ENSBTAG00000031209	7	23382935	23425468	SLC22A4	protein_coding
ENSBTAG00000045035	7	23425297	23425367	bta-mir-2457	miRNA
ENSBTAG00000015426	7	23443528	23457942	PDLIM4	protein_coding
ENSBTAG00000001116	7	23480315	23513315	P4HA2	protein_coding
ENSBTAG00000031205	7	23580042	23580833		protein_coding
ENSBTAG00000042517	7	23651624	23651730	RF00026	snRNA
ENSBTAG00000001570	7	23694183	23696548	CSF2	protein_coding
ENSBTAG00000002140	7	23709467	23711664	IL3	protein_coding
ENSBTAG00000019708	7	23779096	23882198	ACSL6	protein_coding
ENSBTAG00000036856	7	23852876	23852996	RF00001	rRNA
ENSBTAG00000025443	7	23993128	24063506	FNIP1	protein_coding
ENSBTAG00000000626	7	60450229	60579589	STK32A	protein_coding
ENSBTAG00000010661	7	60588659	60703487	DPYSL3	protein_coding
ENSBTAG00000003349	7	60809074	60998968	JAKMIP2	protein_coding
ENSBTAG00000047835	7	61034482	61036502		protein_coding
ENSBTAG00000015558	7	61042755	61049774	SPINK1	protein_coding
ENSBTAG00000004153	7	61104006	61108298	SCGB3A2	protein_coding
ENSBTAG00000015465	7	61133266	61145126	C7H5orf46	protein_coding
ENSBTAG00000042643	7	61294716	61294819	RF00026	snRNA
ENSBTAG00000019140	7	61321641	61405244	SPINK5	protein_coding
ENSBTAG00000024091	11	1747909	1780103	MALL	protein_coding
ENSBTAG00000034586	11	1821486	1846701	MAL	protein_coding
ENSBTAG00000034657	11	1886690	1891332		protein_coding
ENSBTAG00000008241	11	1895750	1918798	MRPS5	protein_coding
ENSBTAG00000001947	11	1934700	1943563	ZNF514	protein_coding
ENSBTAG00000001949	11	1953347	1958756	ZNF2	protein_coding
ENSBTAG00000047503	11	1961073	1961481		protein_coding
ENSBTAG00000001952	11	1991029	2005653	PROM2	protein_coding
ENSBTAG00000017955	11	2079469	2096936		protein_coding
ENSBTAG00000011553	11	2119290	2130742	FAHD2A	protein_coding
ENSBTAG00000011558	11	2130834	2140973	GPAT2	protein_coding
ENSBTAG00000009510	11	2221056	2222399	ADRA2B	protein_coding
ENSBTAG00000020348	11	2231384	2245550	ASTL	protein_coding
ENSBTAG00000020350	11	2250455	2252492	DUSP2	protein_coding
ENSBTAG00000018372	11	2286338	2305243	STARD7	protein_coding
ENSBTAG00000015667	11	2324293	2335178	TMEM127	protein_coding
ENSBTAG00000015659	11	2335382	2342308	CIAO1	protein_coding
ENSBTAG00000000848	11	2343017	2368147	SNRNP200	protein_coding
ENSBTAG00000047659	11	2390344	2390799		processed_pseudogene
ENSBTAG00000034995	11	2394759	2396426	ITPRIPL1	protein_coding
ENSBTAG00000012925	11	2401655	2435800	NCAPH	protein_coding
ENSBTAG00000002965	11	2488165	2494781	NEURL3	protein_coding
ENSBTAG00000014090	11	2526186	2537850	ARID5A	protein_coding
ENSBTAG00000004497	11	2556384	2598104	KANSL3	protein_coding
ENSBTAG00000042133	11	2573070	2573176	RF00026	snRNA
ENSBTAG00000003963	11	2598255	2651937	FER1L5	protein_coding
ENSBTAG00000003975	11	2653390	2672003	LMAN2L	protein_coding
ENSBTAG00000019213	11	2690660	2725964	CNNM4	protein_coding
ENSBTAG00000010846	11	2730998	2762524	CNNM3	protein_coding
ENSBTAG00000010849	11	2768909	2773197	ANKRD23	protein_coding
ENSBTAG00000035244	11	2775465	2782703	ANKRD39	protein_coding
ENSBTAG00000021920	11	2784990	2793644	SEMA4C	protein_coding
ENSBTAG00000006019	11	2798822	2907015	FAM178B	protein_coding
ENSBTAG00000018542	11	2916017	2918064	COX5B	protein_coding
ENSBTAG00000048041	11	2929639	2943356	ACTR1B	protein_coding
ENSBTAG00000005892	11	3016325	3056118	ZAP70	protein_coding
ENSBTAG00000006744	11	3081934	3160004	TMEM131	protein_coding
ENSBTAG00000034384	11	3366420	3528949	VWA3B	protein_coding
ENSBTAG00000029790	13	55237544	55237619	bta-mir-1-1	miRNA
ENSBTAG00000047944	13	55291395	55301357	GATA5	protein_coding
ENSBTAG00000003163	13	55329942	55342707	RBBP8NL	protein_coding
ENSBTAG00000020797	13	55346048	55356672	CABLES2	protein_coding
ENSBTAG00000020795	13	55358720	55359979	RPS21	protein_coding
ENSBTAG00000045225	13	55374500	55374578	bta-mir-2306	miRNA
ENSBTAG00000003061	13	55379959	55433278	LAMA5	protein_coding
ENSBTAG00000003058	13	55433440	55439176	ADRM1	protein_coding
ENSBTAG00000017402	13	55448212	55464735	OSBPL2	protein_coding
ENSBTAG00000005127	13	55501437	55506984	PSMA7	protein_coding
ENSBTAG00000021558	13	55509535	55517058		protein_coding
ENSBTAG00000031625	13	55519323	55521407	HRH3	protein_coding
ENSBTAG00000014442	13	55530681	55537451	MTG2	protein_coding
ENSBTAG00000014438	13	55538716	55566383	SS18L1	protein_coding
ENSBTAG00000047991	13	55627852	55655516	TAF4	protein_coding
ENSBTAG00000015058	13	55672235	55803649	CDH4	protein_coding
ENSBTAG00000033056	16	35407318	35635138	PLD5	protein_coding
ENSBTAG00000013700	16	35698745	35700058	BECN2	protein_coding
ENSBTAG00000012462	16	35727294	35733187	MAP1LC3C	protein_coding
ENSBTAG00000009396	16	35747266	35788726	EXO1	protein_coding
ENSBTAG00000005200	16	35800136	35935901	WDR64	protein_coding
ENSBTAG00000010803	16	35948787	35950742	CHML	protein_coding
ENSBTAG00000014439	16	35975651	36045361	KMO	protein_coding
ENSBTAG00000044285	16	36033833	36033896		miRNA
ENSBTAG00000021688	16	36059726	36086821	FH	protein_coding
ENSBTAG00000005410	16	36195998	36695079	RGS7	protein_coding
ENSBTAG00000001241	20	27745415	27755504	ISL1	protein_coding
ENSBTAG00000028641	20	27866523	27866632	RF00001	rRNA
ENSBTAG00000042274	20	27987577	27987683	RF00026	snRNA
ENSBTAG00000004066	20	28315521	28506629	PARP8	protein_coding
ENSBTAG00000044320	20	28572649	28572720	RF00085	snoRNA
